# Supplementary material for: Pore-free bubbling delamination of chemical vapor deposited graphene from copper foils
Source: Royal Society of Chemistry journal article supplement (doi:10.1039/c5tc01771h), 2015-01-01
Supplement: c5tc01771h1.pdf [file c5tc01771h1.pdf]

## Supporting Information

### Pore-free Bubbling Delamination of Chemical Vapor Deposited Graphene from Copper Foils

Zhaoyao Zhan,\* Jie Sun,\* Lihui Liu, Ergang Wang, Yu Cao, Niclas Lindvall, Grigory Skoblin, and Avgust Yurgens

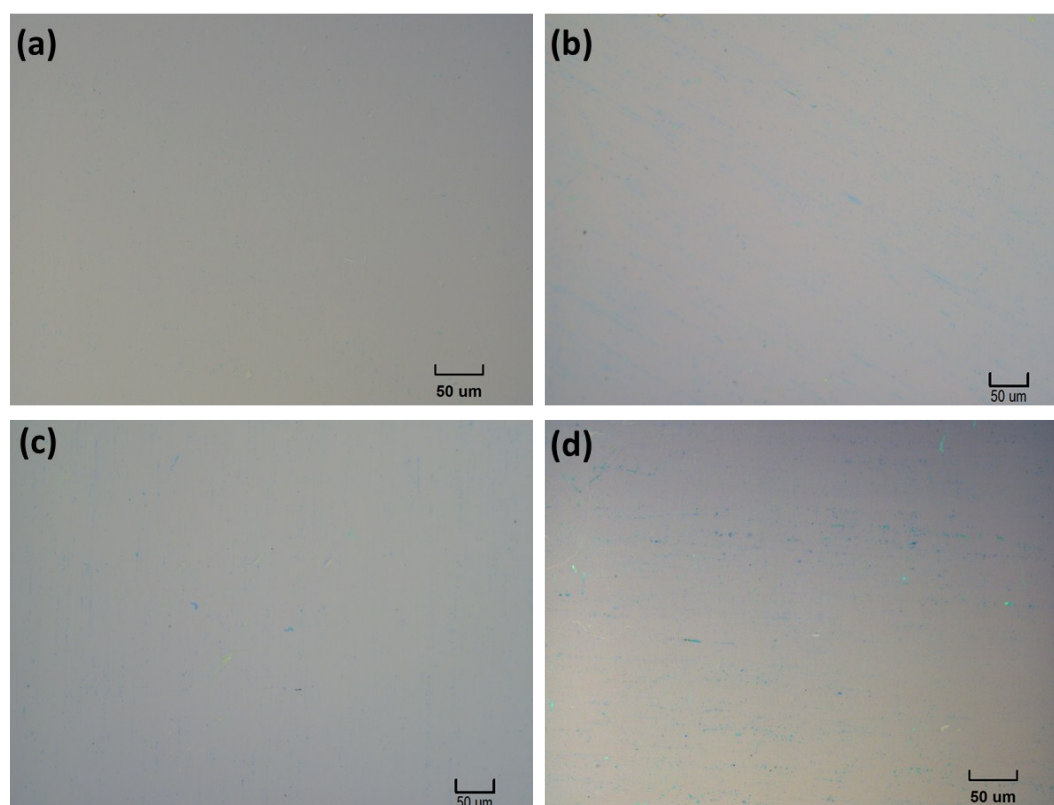

Figure S1. The morphology of etch transferred graphene with PMMA supporting layer thickness of (a) 600 nm; (b) 420 nm; (c) 340nm; and (d) 290 nm respectively.
